# Supplementary material
Source: Springer Nature journal article supplement (https://www.springermedizin.de/resource/supplementary/12883_2010_408_MOESM2_ESM.pdf/9455276)
Supplement: MOESM2 [file 9455276]

14 articles identified from  
MEDLINE

14 articles identified from  
EMBASE

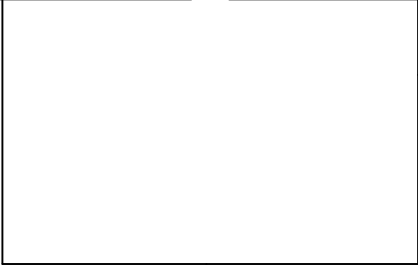

14 excluded:  
- 6 duplicates  
- 5 duplicated reports/or  
commentaries  
- 2 systematic reviews  
- 1 narrative review

14 eligible for review

8 excluded:  
- 2 Spanish papers  
- 6 subsets or  
duplicated reports

6 included in the review
